# Supplementary material
Source: PubMed Central journal article supplement (PMC3487552)
Supplement: supp_2011.059956_2012_059956-Contributions.pdf [file supp_2011.059956_2012_059956-Contributions.pdf]

**Manuscript no. HAEMATOL/2011/059956 entitled “Arachidonic acid depletion extends survival of cold stored platelets by interfering with [Glycoprotein Iba - 14-3-3ζ] association“**

**Authors: Dianne E. van der Wal, Eelo Gitz, Vivian X. Du, Kimberly S.L. Lo, Cornelis A. Koekman, Sabine Versteeg and Jan Willem N. Akkerman**

**Information about the contributions of each person named as having participated in the study**

**1) Guarantor(s)**, i.e., person(s) who is (are) responsible for the integrity of the work as a whole:  
• Prof. dr. Jan-Willem N. Akkerman, Department of Clinical Chemistry and Haematology, University Medical Center Utrecht, Utrecht, 3584CX, the Netherlands,  
[j.w.n.akkerman@umcutrecht.nl](mailto:j.w.n.akkerman@umcutrecht.nl)

According to the International Committee of Medical Journal Editors (ICMJE) ([http://www.icmje.org/ethical\\_1author.html](http://www.icmje.org/ethical_1author.html)): “*Authorship credit should be based on: 1) substantial contributions to conception and design, acquisition of data, or analysis and interpretation of data; 2) drafting the article or revising it critically for important intellectual content; and 3) final approval of the version to be published. Authors should meet conditions 1, 2, and 3 ..... Acquisition of funding, collection of data, or general supervision of the research group alone does not constitute authorship*”.

The guarantors of this manuscript confirm that all persons designated as authors qualify for authorship, and that each author has participated sufficiently in the work to take public responsibility for appropriate portions of the content.

2) Authors who participated in the **conception of the study**: Dianne van der Wal, Eelo Gitz, Jan-Willem Akkerman

3) **Design & Methods**. The following authors were responsible for specific investigations (please detail):

- Dianne van der Wal, Eelo Gitz, Vivian Du, Kimberly Lo and Cornelis Koekman were responsible for platelet isolations and incubations
- Vivian Du and Cornelis Koekman were responsible for western blots and immunoprecipitations
- Dianne van der Wal and Eelo Gitz were responsible for flow cytometric analysis
- Kimberly Lo and Cornelis Koekman were responsible for P38MAPK, measurement of free-AA, AA conversion to TxA<sub>2</sub> and COX-1 activity assays
- Eelo Gitz and Sabine Versteeg were responsible for platelet survival in vivo
- Eelo Gitz and Dianne van der Wal were responsible for statistical analysis

4) **Results**. The following authors were responsible for specific portions of the results, including figures and tables (please indicate the person responsible for each figure and each table):

- Dianne van der Wal and Eelo Gitz were responsible for figure 1
- Dianne van der Wal, Eelo Gitz and Cornelis Koekman were responsible for figure 2
- Dianne van der Wal, Cornelis Koekman and Vivian Du were responsible for figure 3
- Eelo Gitz and Cornelis Koekman were responsible for figure 4
- Cornelis Koekman was responsible for figure 5
- Eelo Gitz was responsible for figure 6

5) **Writing the manuscript**. The following authors were responsible for writing the manuscript:

- Dianne van der Wal, Eelo Gitz and Jan-Willem Akkerman were responsible for writing the manuscript

**6) Contributors Listed in Acknowledgments:**

The authors thank Dr. R.T. Urbanus at the UMCU for discussions. This study was supported by a grant from the Landsteiner Foundation of Blood transfusion Research (LSBR grant nr. 0510). Prof. Dr. J.W.N. Akkerman is supported by the Netherlands Thrombosis Foundation.
